# Supplementary material
Source: PubMed Central journal article supplement (PMC2951707)
Supplement: 97320630004448S1.pdf [file 97320630004448S1.pdf]

**Supplementary material:**

**Table 1:** Types & numbers of PTM and functional classification of Rotavirus proteins

| Protein            | No & type of Phosphorylation sites | No & type of Glycosylation sites | No & type of SUMOylation sites | No. & type of Methylation sites       | No. & type of Acetylation sites | Protein Functional Family (only P-value ≥ 80% are taken)                               |
|--------------------|------------------------------------|----------------------------------|--------------------------------|---------------------------------------|---------------------------------|----------------------------------------------------------------------------------------|
| NSP1<br>(59 kDa)   | Ser= 10, Thr=8 &<br>Tyr= 8         | N-linked= 4<br>O-linked= 1       | Type I=0<br>TypeII=3           |                                       | N6-acetyl<br>lysine=1           | Zinc-binding<br>RNA-binding<br>Metal binding<br>Zinc-binding                           |
| NSP2<br>(35 kDa)   | Ser= 7, Thr=2 &<br>Tyr=3           | N-linked= 1<br>O-linked= 0       | Type I=1<br>TypeII=5           | Assymmetric<br>Dimethyl<br>arginine=1 |                                 | Zinc-binding                                                                           |
| NSP3<br>(37 kDa)   | Ser= 15, Thr=3 &<br>Tyr= 5         | N-linked= 0<br>O-linked= 0       | Type I=1<br>TypeII=3           | Assymmetric<br>Dimethyl<br>arginine=1 |                                 | Zinc-binding                                                                           |
| NSP4<br>(20 kDa)   | Ser= 3, Thr= 5 &<br>Tyr= 1         | N-linked= 2<br>O-linked= 1       | Type I=0<br>TypeII=1           | Assymmetric<br>Dimethyl<br>arginine=1 |                                 | Transmembrane                                                                          |
| NSP5<br>(22 kDa)   | Ser= 25, Thr=1 &<br>Tyr= 5         | N-linked= 1<br>O-linked=8        | Type I=1<br>TypeII=4           |                                       | N6-acetyl<br>lysine=1           | Coat protein                                                                           |
| VP1<br>(125 kDa)   | Ser= 33, Thr= 10 &<br>Tyr= 21      | N-linked= 5<br>O-linked=0        | Type I=2<br>TypeII=1           | Assymmetric<br>Dimethyl<br>arginine=2 | N6-acetyl<br>lysine=3           | Transferase<br>Structural protein<br>DNA replication<br>All DNA-binding<br>RNA-binding |
| VP2<br>(102 kDa)   | Ser= 12, Thr= 6 &<br>Tyr= 8        | N-linked= 3<br>O-linked=1        | Type I=1<br>TypeII=12          | Assymmetric<br>Dimethyl<br>arginine=4 |                                 | Zinc-binding                                                                           |
| VP3<br>(88 kDa)    | Ser= 15, Thr=10 &<br>Tyr= 21       | N-linked= 9<br>O-linked=1        | Type I=5<br>TypeII=5           | Assymmetric<br>Dimethyl<br>arginine=2 | N6-acetyl<br>lysine=1           | Zinc-binding                                                                           |
| VP4<br>(87 kDa)    | Ser= 34, Thr= 18 &<br>Tyr= 12      | N-linked= 12<br>O-linked=1       | Type I=2<br>TypeII=1           | Assymmetric<br>Dimethyl<br>arginine=1 |                                 | Coat protein                                                                           |
| VP6<br>(45 kDa)    | Ser= 9, Thr= 6 &<br>Tyr= 3         | N-linked= 3<br>O-linked=1        | Type I=0<br>TypeII=1           | Assymmetric<br>Dimethyl<br>arginine=1 |                                 | Coat protein                                                                           |
| VP7<br>(34/38 kDa) | Ser= 7, Thr= 3 &<br>Tyr= 3         | N-linked= 1<br>O-linked= 0       | Type I=0<br>TypeII= 2          |                                       |                                 | Transmembrane<br>Coat protein                                                          |
